# Supplementary material for: Functional Analysis of the P-Type ATPases Apt2-4 from Cryptococcus neoformans by Heterologous Expression in Saccharomyces cerevisiae
Source: MDPI journal article supplement (doi:10.3390/jof9020202), 2023-02-04
Supplement: s1 [file s1]

**Functional analysis of the P-type ATPases Apt2-4 from *Cryptococcus neoformans*  
by heterologous expression in *Saccharomyces cerevisiae***

**Sarina Veit <sup>1</sup>, Sabine Laerbusch <sup>1</sup>, Rosa L. López-Marqués <sup>2,\*</sup>, Thomas Günther  
Pomorski <sup>1,2,\*</sup>**

**Supplementary Information**

This file includes all supplementary information for the manuscript:

- Tables S1 and S2
- Figures S1 and S2

**Supplementary Table S1: Primer sets used for cloning.**

| Set    | Name                   | Sequence                                                 |
|--------|------------------------|----------------------------------------------------------|
| #2-Nt  | APT2- Frag1.FOR        | 5'-AAAAAACCCCGGATCCATGACTGCCTCTACTTATCAATCT-CATGG-3'     |
|        | APT2- Frag1.REV        | 5'-CTGAATTCGAATTCCTCCTCCGATAAATTTCTATACGC-3'             |
| #2-Ct  | APT2- Frag2.FOR        | 5'-GGAATTCGAATTCAGCGATTGGTCAAAAAAATATGACAC-3'            |
|        | APT2-Frag2.REV         | 5'-CCAGAACCTATAGCATATCCTGCACCTTCCCATTTCG-3'              |
| #2-myc | APT2spacer-myc-for     | 5'-TGCTATAGGTTCTGGTTCTGGTTCTGGTTCTGA-3'                  |
|        | APT2-4-myc-rev         | 5'-GTCGTATTACGGATCCTTACTCGAGGTCTTCTTCGGAAA-TCAACTTCTG-3' |
| #2-GFP | APT2-GFP-Frag3.FOR     | 5'-TGCTATAGGTTCTGGTTCTGGTTCTGGTTCTA-3'                   |
|        | APT2-4-GFP-Frag3.REV   | 5'-GTCGTATTACGGATCCTTACTTGTACAGC-3'                      |
| #3     | APT3-Frag1.FOR         | 5'-AAAAAACCCCGGATCCATGCCTGCGCAACAGC-3'                   |
|        | APT3-Frag1.REV         | 5'-CCAGAACCATACCCTGAAGGCCTCGC-3'                         |
| #3-myc | APT3spacer-myc-for     | 5'-AGGGTATGGTTCTGGTTCTGGTTCTGGTTCTGA-3'                  |
|        | APT2-4-myc-rev         | 5'-GTCGTATTACGGATCCTTACTCGAGGTCTTCTTCGG-AAATCAACTTCTG-3' |
| #3-GFP | APT3-GFP-Frag2.FOR     | 5'-AGGGTATGGTTCTGGTTCTGGTTCTGGTTCTA-3'                   |
|        | APT2-4-GFP-Frag3.REV   | 5'-GTCGTATTACGGATCCTTACTTGTACAGC-3'                      |
| #4     | APT4-Frag1.FOR         | 5'-AAAAAACCCCGGATCCATGTCAACCTACTCGCGCACG-3'              |
|        | APT4-Frag1.REV         | 5'-CCAGAACCTATCCCAGCCACCTTCTTGTAAGCC-3'                  |
| #4-myc | APT4spacer-myc-for     | 5'- TGGGATAGGTTCTGGTTCTGGTTCTGGTTCTGA-3'                 |
|        | APT2-4-myc-rev         | 5'-GTCGTATTACGGATCCTTACTCGAGGTCTTCTTCGGAAA-TCAACTTCTG-3' |
| #4-GFP | APT4-GFP-GFP-Frag2.FOR | 5'-TGGGATAGGTTCTGGTTCTGGTTCTGGTTCTA-3'                   |
|        | APT2-4-GFP-Frag3.REV   | 5'-GTCGTATTACGGATCCTTACTTGTACAGC-3'                      |

**Supplementary table S2: Yeast expression plasmids used in this study.**

| Name   | Marker | Description               | Source                                      |
|--------|--------|---------------------------|---------------------------------------------|
| pTP022 | URA    | pESC-URA vector (#217454) | Agilent Technologies (Santa Clara, CA, USA) |
| pTP772 | URA    | APT1-GFP CDC50-FLAG       | (Stanchev et al., 2021)                     |
| pTP768 | URA    | APT1-GFP                  | (Stanchev et al., 2021)                     |
| pTP771 | URA    | APT1-myc CDC50-FLAG       | (Stanchev et al., 2021)                     |
| pTP767 | URA    | APT1-myc                  | (Stanchev et al., 2021)                     |
| pTP808 | URA    | APT2-GFP CDC50-FLAG       | This study                                  |
| PTP724 | URA    | APT2-GFP                  | This study                                  |
| pTP815 | URA    | APT2-myc CDC50-FLAG       | This study                                  |
| pTP723 | URA    | APT2-myc                  | This study                                  |
| pTP809 | URA    | APT3-GFP CDC50-FLAG       | This study                                  |
| pTP726 | URA    | APT3-GFP                  | This study                                  |
| pTP816 | URA    | APT3-myc CDC50-FLAG       | This study                                  |
| pTP725 | URA    | APT3-myc                  | This study                                  |
| pTP810 | URA    | APT4-GFP CDC50-FLAG       | This study                                  |
| pTP819 | URA    | APT4-GFP                  | This study                                  |
| pTP817 | URA    | APT4-myc CDC50-FLAG       | This study                                  |
| pTP818 | URA    | APT4-myc                  | This study                                  |

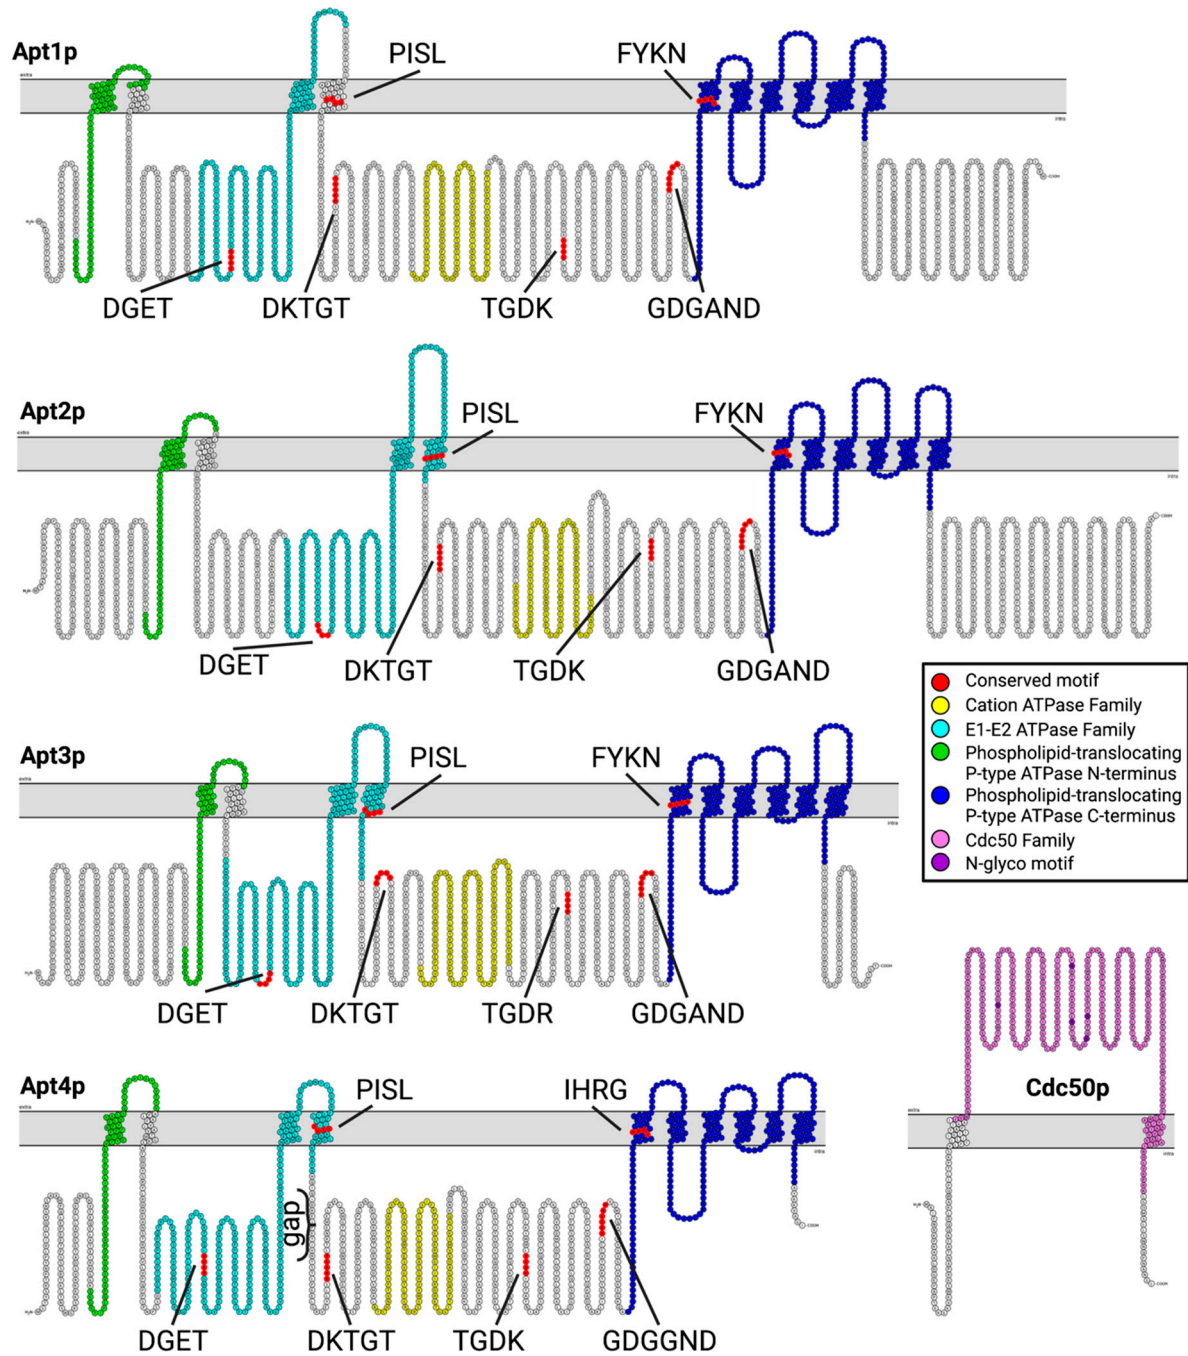

**Figure S1: Topology prediction of Apt1-4p and Cdc50p from *Cryptococcus neoformans*.** Transmembrane domains were predicted by sequence alignment with *S. cerevisiae* homolog and structure prediction with SWISS-MODEL. Protein family conserved domains were determined with Pfam and conserved P4-ATPase motifs are highlighted in red. Visualization done with Protter.

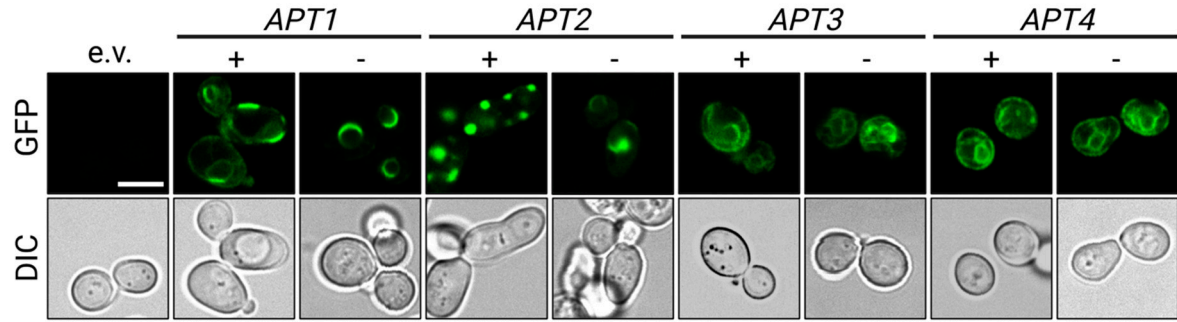

**Figure S2: Intracellular localization of GFP-tagged Apt proteins upon heterologous expression in the P4-ATPase-deficient *S. cerevisiae* strain *dnf1Δdnf2Δdrs2Δ*.** Cells transformed with an empty plasmid vector (e.v.) or with plasmids expressing the indicated GFP-tagged APT variants with (+) or without (-) *CDC50-FLAG* were grown in SD-U medium and induced in SG-U medium at 25°C for 24 h. Cells were analysed using differential interference contrast (DIC) microscopy and confocal fluorescence microscopy (GFP). Image acquisition were carried out on living cells using a spectral confocal laser scanning microscope (Leica TCS SP8) using a 63×/1.4 numerical-aperture (NA) oil objective. GFP was excited at 488 nm, and emission signals were recorded between 500 and 550 nm. Scale bar, 5 μm.
